# Supplementary material for: Sustainable green-synthesized hematite nanocatalysts and their efficient reduction of aromatic nitro pollutants
Source: Royal Society of Chemistry journal article supplement (doi:10.1039/d5ra09934j), 2026-05-05
Supplement: d5ra09934j1.pdf [file d5ra09934j1.pdf]

## **Sustainable Green synthesized Hematite Nanocatalysts and their Efficient Reduction of Aromatic Nitro Pollutants**

Johnson Paul Jesudasson<sup>a</sup>, Monikadevi P<sup>a</sup>, Rama P<sup>a</sup>, Jothika M<sup>a</sup>, Sivakami S<sup>a</sup>, Selvaraj Mohana Roopan<sup>b</sup>, Karuppiyah Muthu<sup>a\*</sup>.

<sup>a</sup>Department of Chemistry, Manonmaniam Sundaranar University, Abishekapatti, Tirunelveli-627012, Tamil Nadu, India.

<sup>b</sup>Department of Chemistry, Chemistry of Heterocycles and Natural Product Research Laboratory, School of Advanced Sciences, Vellore Institute of Technology, Vellore 632 014, Tamil Nadu, India.

\*Corresponding author: karu.muthu@msuniv.ac.in (K. Muthu)

### **Supporting Documents**

#### **Supporting Figure Legends**

**Fig.S1. UV-Vis Spectra: a) 4-NP&4-AP; b) 4-NA& 1,4-DAB; c) 2-NB & 2-AB; d) 2,4-DNA & 1,2,4-TAB.**

**Fig.S2. Reduction kinetics of ANC: a) Absorbance vs Time; b)  $\ln(A/A_0)$  vs Time by  $\text{NaBH}_4$ . (Condition: ANC= 2mmol;  $\text{NaBH}_4$ = 1mmol; Temp.= 38°C; Solvent= water).**

**Fig.S3. Reduction kinetics of ANC: a) Absorbance vs Time; b) $\ln(A/A_0)$  vs Time by HNPs. (Condition: ANC= 2mmol; HNPs= 6.25mol%; Temp.= 38°C; Solvent= water).**

**Fig.S4. Recycle absorbance vs Time. (Condition: ANC= 2mmol; HNPs= 6.25mol%; Temp.= 38°C; Solvent= water).**

**Fig. S5. Linear Fit for Reduction of 4-NP by  $\text{NaBH}_4$ . (Condition: ANC= 2mmol;  $\text{NaBH}_4$ = 1mmol; Temp.= 38°C; Solvent= water).**

**Fig. S6. Linear Fit for Reduction of 4-NA by  $\text{NaBH}_4$ . (Condition: ANC= 2mmol;  $\text{NaBH}_4$ = 1mmol; Temp.= 38°C; Solvent= water).**

**Fig. S7. Linear Fit for Reduction of 2-NB by NaBH<sub>4</sub>. (Condition: ANC= 2mmol; NaBH<sub>4</sub>= 1mmol; Temp.= 38°C; Solvent= water).**

**Fig. S8. Linear Fit for Reduction of 2,4-DNA by NaBH<sub>4</sub>. (Condition: ANC= 2mmol; NaBH<sub>4</sub>= 1mmol; Temp.= 38°C; Solvent= water).**

**Fig. S9. Linear Fit for Reduction of 4-NP by HNPs. (Condition: ANC= 2mmol; HNPs= 6.25mol%; Temp.= 38°C; Solvent= water).**

**Fig. S10. Linear Fit for Reduction of 4-NA by HNPs. (Condition: ANC= 2mmol; HNPs= 6.25mol%; Temp.= 38°C; Solvent= water).**

**Fig. S11. Linear Fit for Reduction of 2-NB by HNPs. (Condition: ANC= 2mmol; HNPs= 6.25mol%; Temp.= 38°C; Solvent= water).**

**Fig. S12. Linear Fit for Reduction of 2,4-DNA by HNPs. (Condition: ANC= 2mmol; HNPs= 6.25mol%; Temp.= 38°C; Solvent= water).**

**Fig. S13. UV-Vis spectrum of reaction mixture after addition of NaBH<sub>4</sub>only,(Condition: ANC= 2mmol; NaBH<sub>4</sub>= 1mmol; Temp.= 38°C; Solvent= water).**

### **Supporting Table Legend**

**Table.S1. Interpretation of d space value and hkl from SAED pattern.**

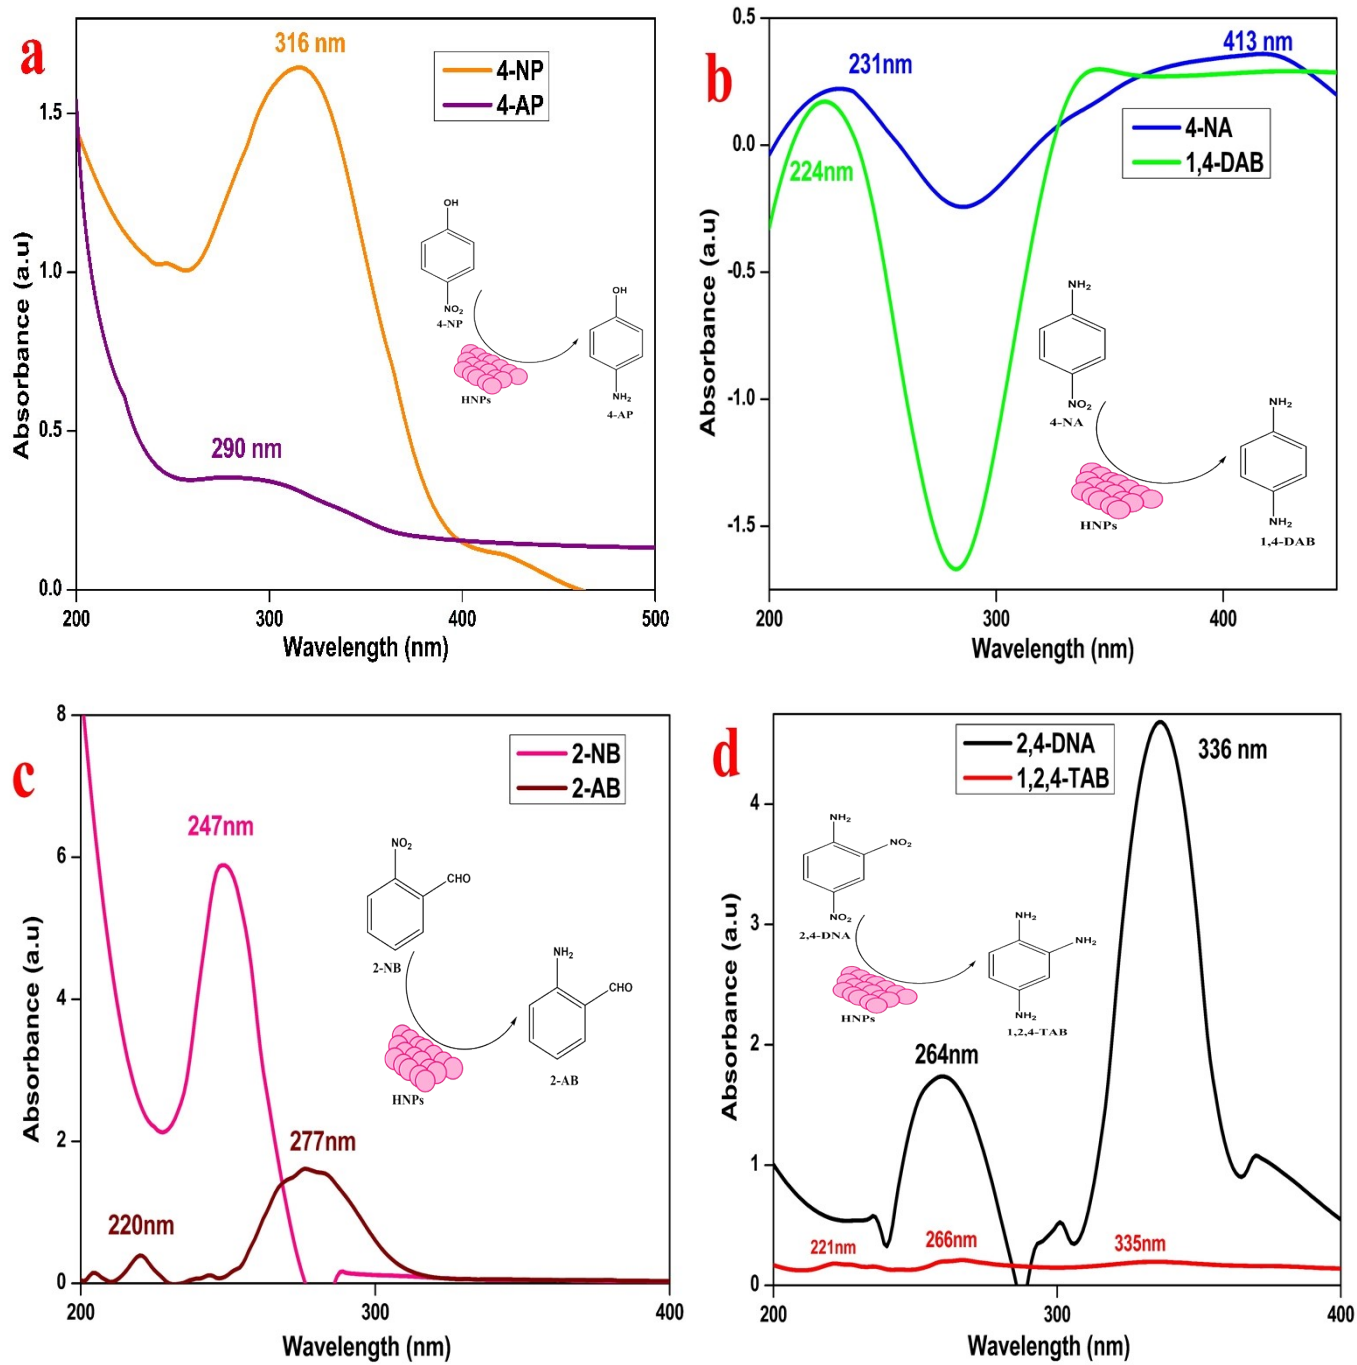

Fig.S1.

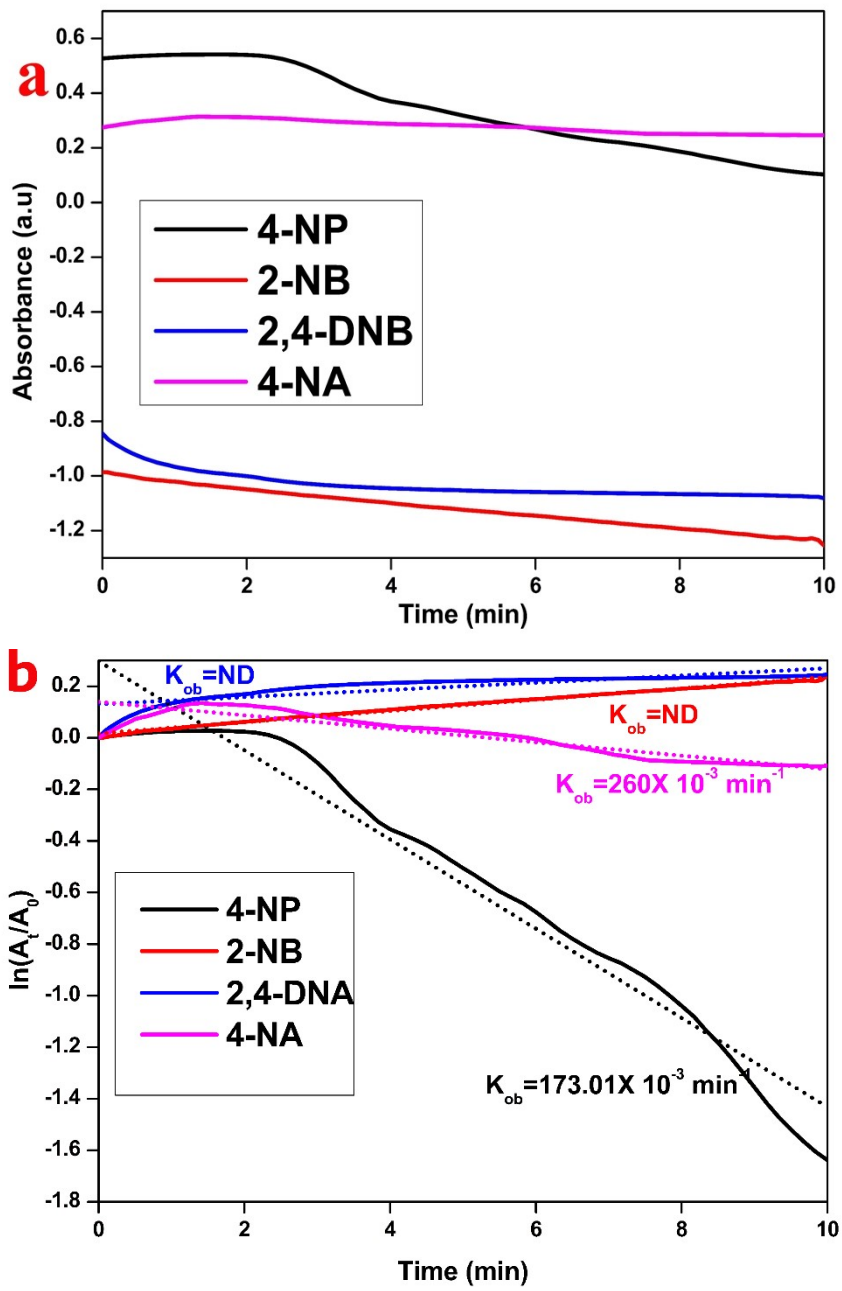

Fig.S2.

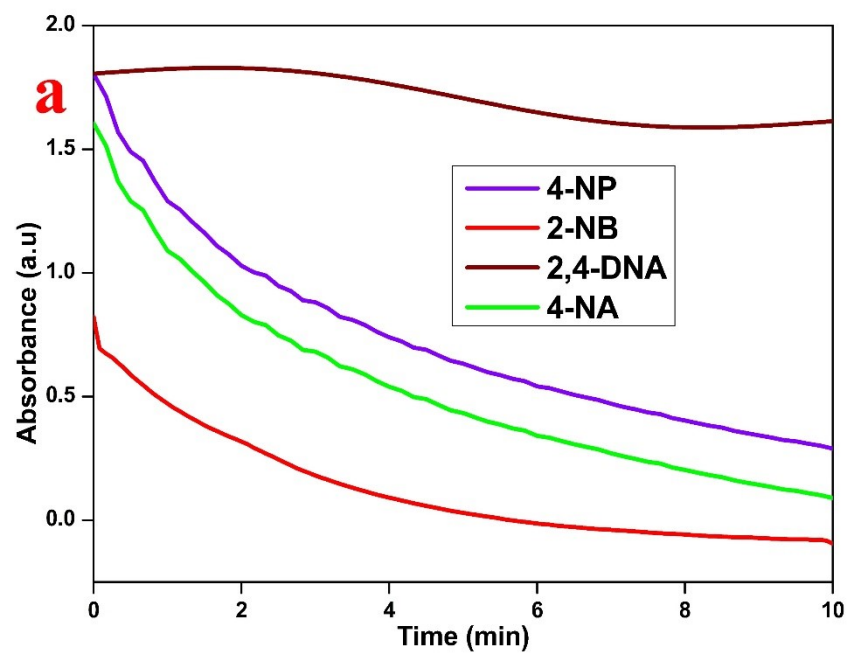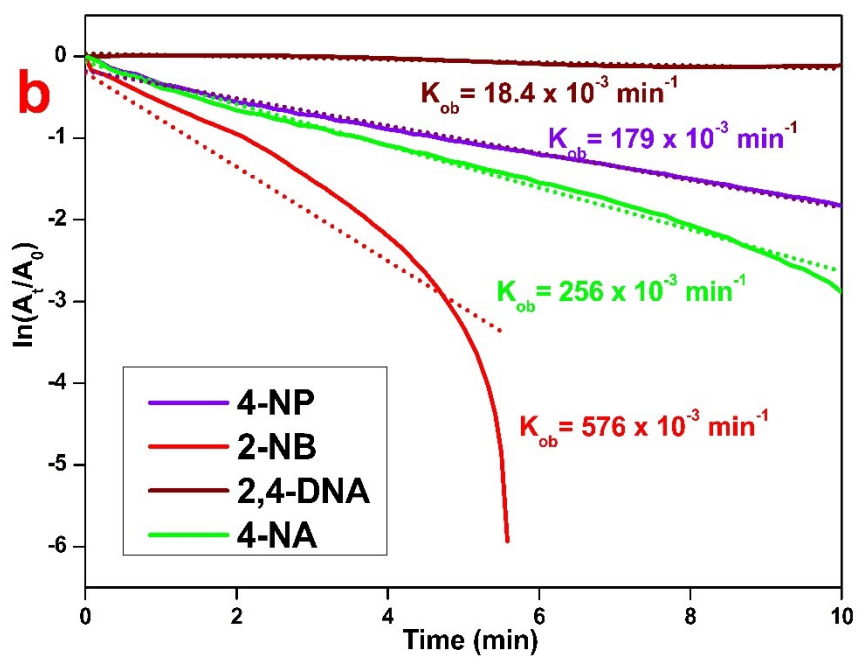

Fig.S3.

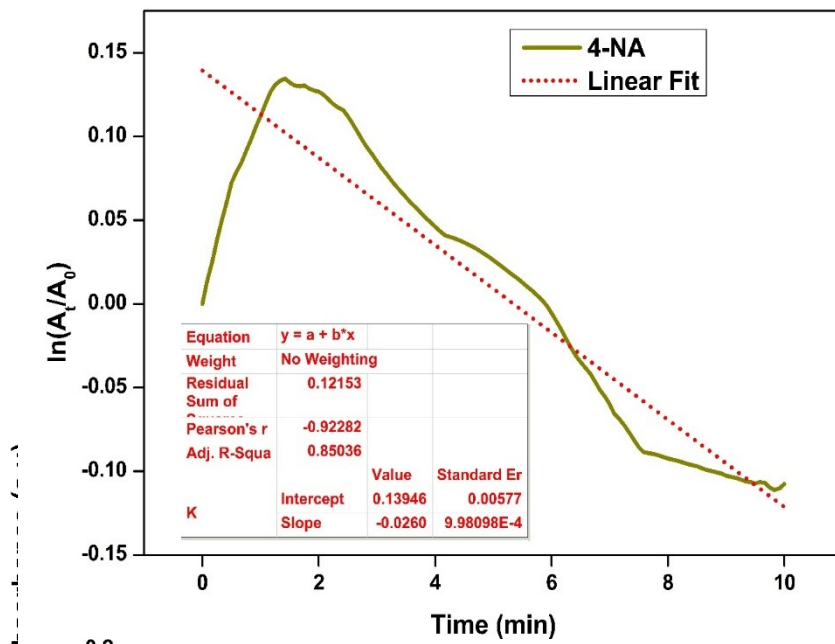

Fig.S4.

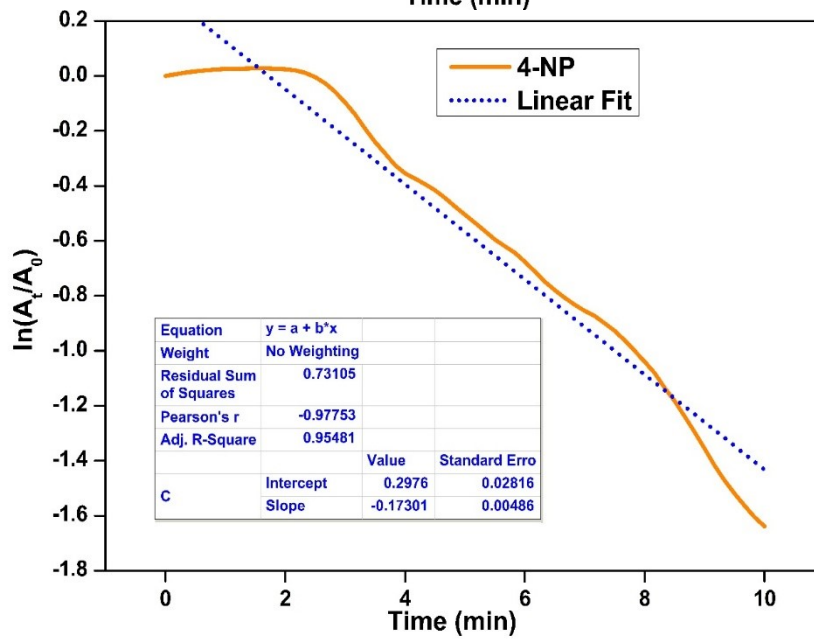

Fig. S5.

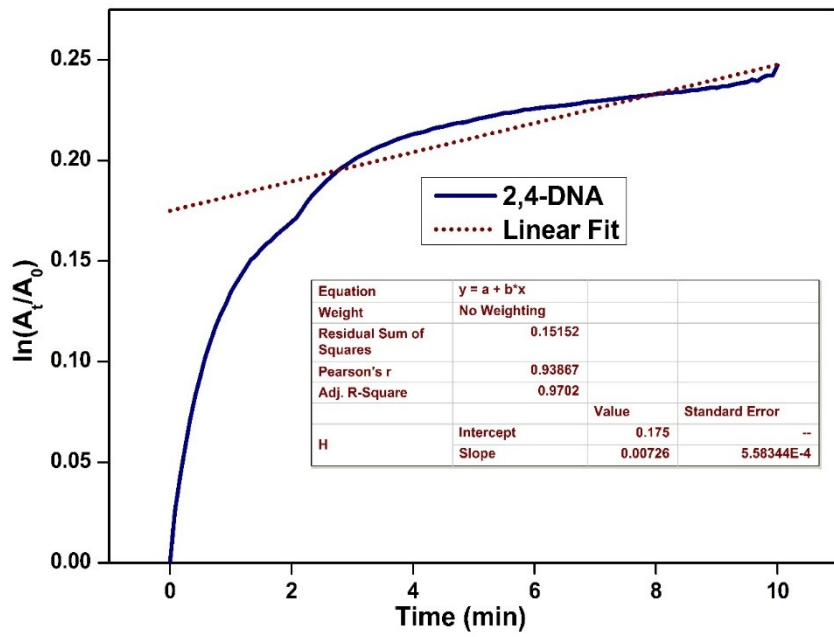

Fig.S6.

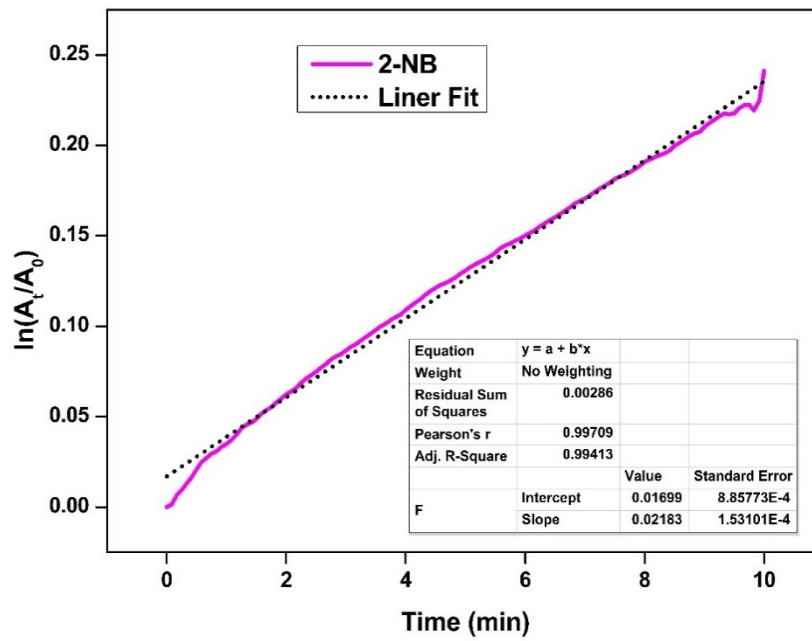

Fig. S7.

Fig.S8.

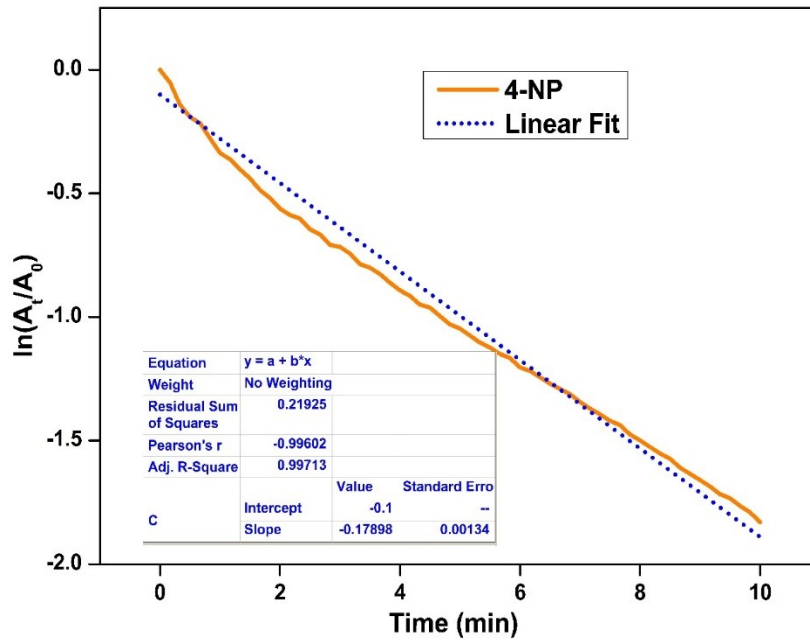

Fig.S9.

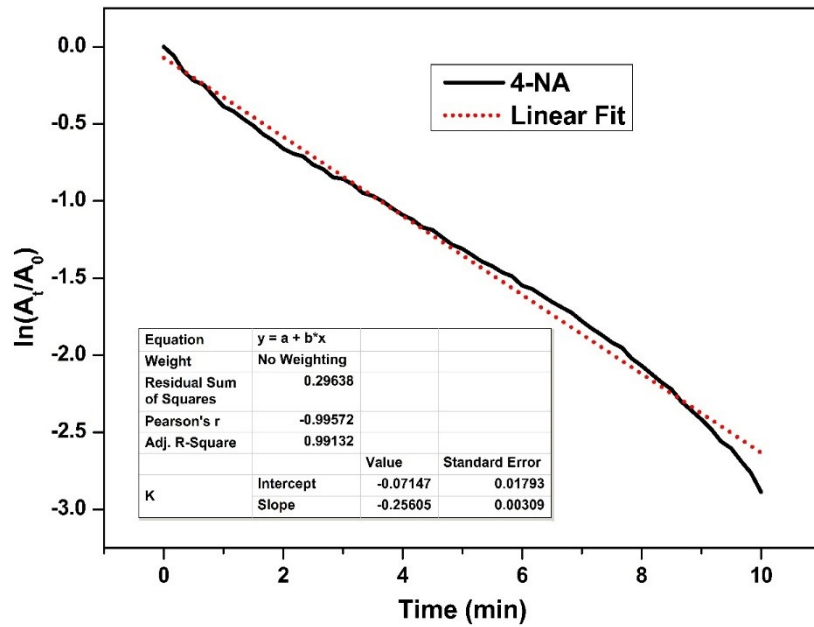

Fig.S10.

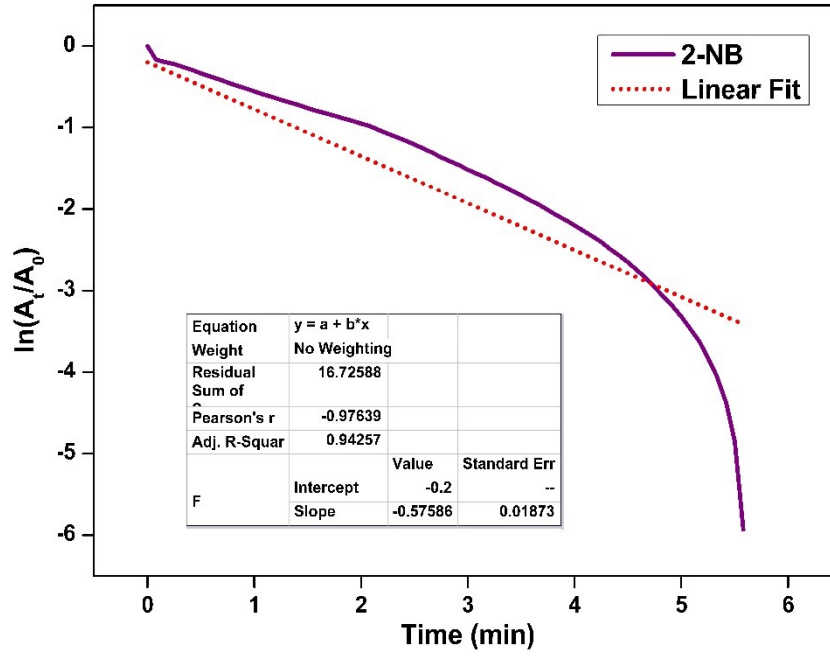

Fig.S11.

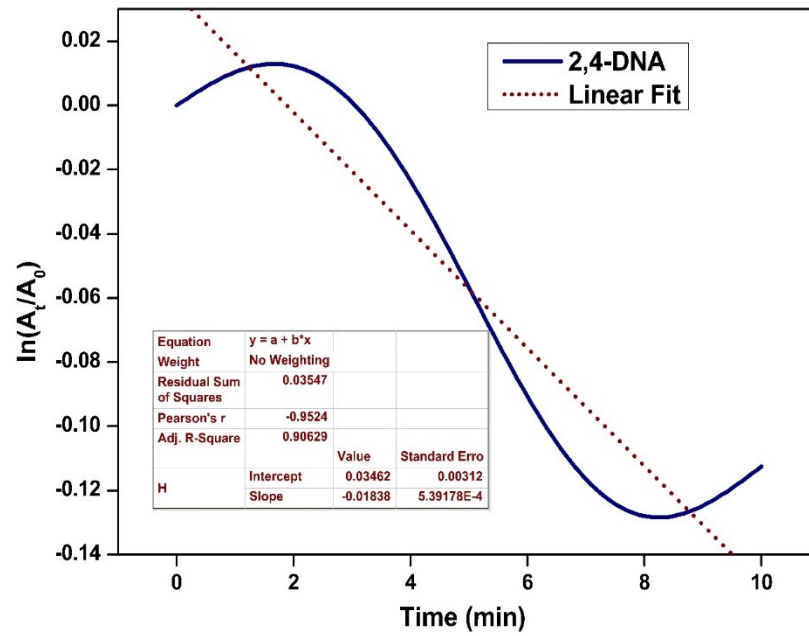

**Fig.S12.**

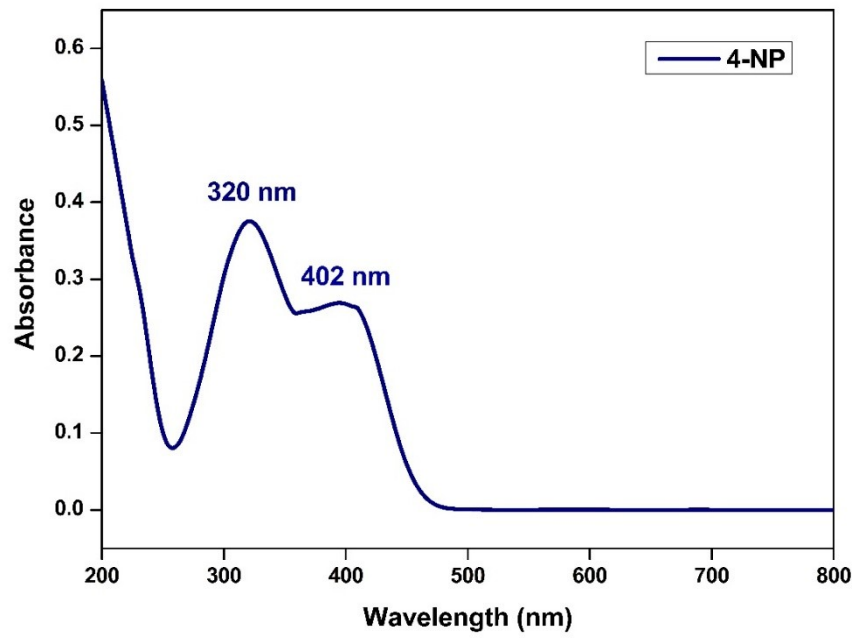

**Fig. S13.**

**Table S1.**

| S. No | $1/2r$ (nm <sup>-1</sup> ) | $1/r$ (nm <sup>-1</sup> ) | $r$ (nm) | d-spacing (nm) | h k l  |
|-------|----------------------------|---------------------------|----------|----------------|--------|
| 1.    | 7.831                      | 3.9155                    | 0.26     | 0.26           | 1 1 0  |
| 2.    | 11.234                     | 5.617                     | 0.18     | 0.18           | 0 2 4  |
| 3.    | 13.857                     | 6.9285                    | 0.14     | 0.14           | 3 0 0  |
| 4.    | 16.953                     | 8.4765                    | 0.12     | 0.12           | 2 1 0  |
| 5.    | 20.086                     | 10.043                    | 0.1      | 0.1            | 4 0 4  |
| 6.    | 23.625                     | 11.8125                   | 0.08     | 0.08           | 1 2 14 |
